# Supplementary material for: Solvent effect on HZSM-5 catalyzed solvolytic depolymerization of industrial waste lignin to phenols: superiority of the water–methanol system over methanol
Source: Royal Society of Chemistry journal article supplement (doi:10.1039/c4ra10240a), 2014-10-08
Supplement: c4ra10240a1.pdf [file c4ra10240a1.pdf]

## Lignin depolymerization using HZSM-5 as catalyst: Effect of Methanol-Water as solvent

Sunit Kumar Singh and Jayant D. Ekhe\*

### *Supporting Information*

#### **Table of Contents**

|                                                                                                                                                                                                                                                                               |    |
|-------------------------------------------------------------------------------------------------------------------------------------------------------------------------------------------------------------------------------------------------------------------------------|----|
| <b>Figure S1</b> Solubility of 20 mg lignin in 5 ml each solvent (used products separation in scheme 1-main paper). W - water, E - ethyl acetate, T – tetrahydrofuran .....                                                                                                   | S2 |
| <b>Table S1</b> Products yields from reactions performed in only methanol and methanol-water mixture.....                                                                                                                                                                     | S2 |
| <b>Figure S2</b> A) EtOAc soluble products B) Water soluble products from the reaction in methanol (Table 3, entry 5), C) EtOAc soluble products D) Water soluble products from the reaction in water-methanol (Table 3, entry 10). *IS-Internal Standard (Phenanthrene)..... | S3 |
| <b>Table S2</b> Compound identified in EtOAc soluble products of reaction in methanol (Table 3, entry 5).....                                                                                                                                                                 | S4 |
| <b>Table S3</b> Compound identified in water soluble products of reaction in methanol (Table 3, entry 5).....                                                                                                                                                                 | S5 |
| <b>Table S4</b> Compound identified in EtOAc soluble products of reaction in water-methanol (Table 3, entry 10).....                                                                                                                                                          | S6 |
| <b>Table S5</b> Compound identified in water soluble products of reaction in water-methanol (Table 3, entry 10).....                                                                                                                                                          | S7 |

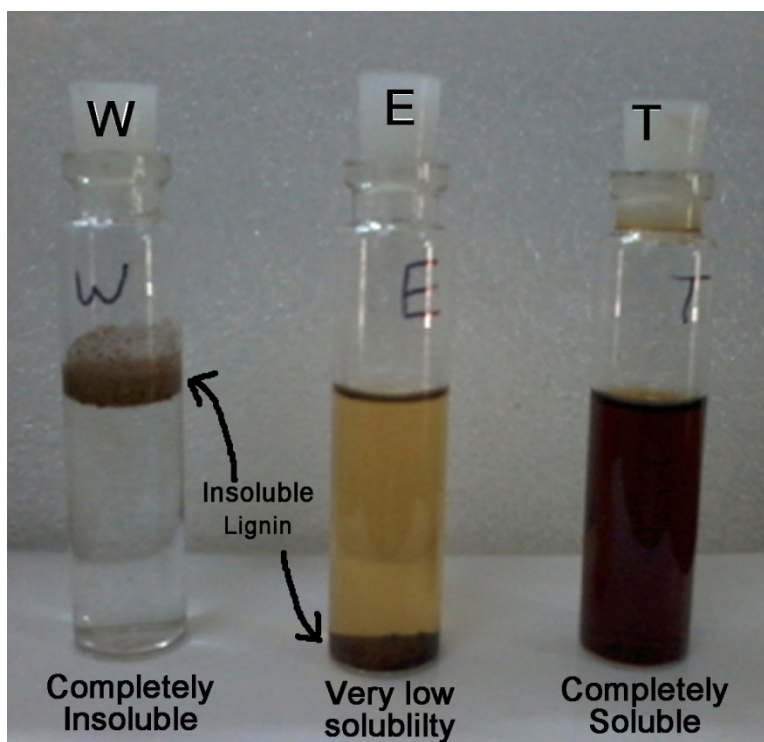

**Figure S1** Solubility of 20 mg lignin in 5 ml of each solvent (used for products separation in scheme 1-main paper). W - water, E - ethyl acetate, T – tetrahydrofuran

**Table S1** Products yields from reactions performed in only methanol and methanol-water mixture.

| Entry            | Solvent              | Reaction time (Hr) | Catalyst (g) | NaOH (mmol) | % Lignin Conversion | % Water Soluble Products <sup>c</sup> | % EtOAc Soluble Products <sup>c</sup> | % THF Soluble Products <sup>c</sup> | % char | % Gaseous Products <sup>c</sup> |
|------------------|----------------------|--------------------|--------------|-------------|---------------------|---------------------------------------|---------------------------------------|-------------------------------------|--------|---------------------------------|
| 1                | Methanol             | 7                  | -            | -           | 73.6                | 10.3                                  | 16.4                                  | 7.5                                 | 18.9   | 46.9                            |
| 2                | Methanol             | 15                 | -            | -           | 68.7                | 9.5                                   | 19.3                                  | 14.7                                | 16.5   | 40.0                            |
| 3                | Methanol             | 7                  | -            | 2           | 68.5                | 2.7                                   | 18.6                                  | 12.5                                | 19.1   | 47.1                            |
| 4                | Methanol             | 15                 | -            | 2           | 43.2                | 3.6                                   | 19.0                                  | 15.1                                | 41.6   | 20.7                            |
| 5                | Methanol             | 7                  | 0.1          | -           | 85.1                | 4.5                                   | 38.5                                  | 2.7                                 | 12.2   | 42.1                            |
| 6                | Methanol             | 15                 | 0.1          | -           | 80.9                | 4.6                                   | 26.5                                  | 2.5                                 | 16.5   | 49.9                            |
| 7                | Methanol-Water (1:1) | 7                  | -            | -           | 56.9                | 9.3                                   | 43.6                                  | 23.8                                | 19.3   | 4.0                             |
| 8                | Methanol-Water (1:1) | 7                  | -            | 2           | 96.3                | 16                                    | 44.1                                  | 3.6                                 | 0.1    | 36.2                            |
| 9                | Methanol-Water (1:1) | 15                 | -            | 2           | 86.4                | 10.9                                  | 42.8                                  | 13.4                                | 0.2    | 32.7                            |
| 10 <sup>20</sup> | Methanol-Water (1:1) | 7                  | 0.1          | 2           | 98.5                | 16                                    | 44.9                                  | 1.2                                 | 0.3    | 37.6                            |
| 11               | Methanol-Water (1:1) | 15                 | 0.1          | 2           | 88.7                | 13.4                                  | 42                                    | 10.7                                | 0.6    | 33.3                            |

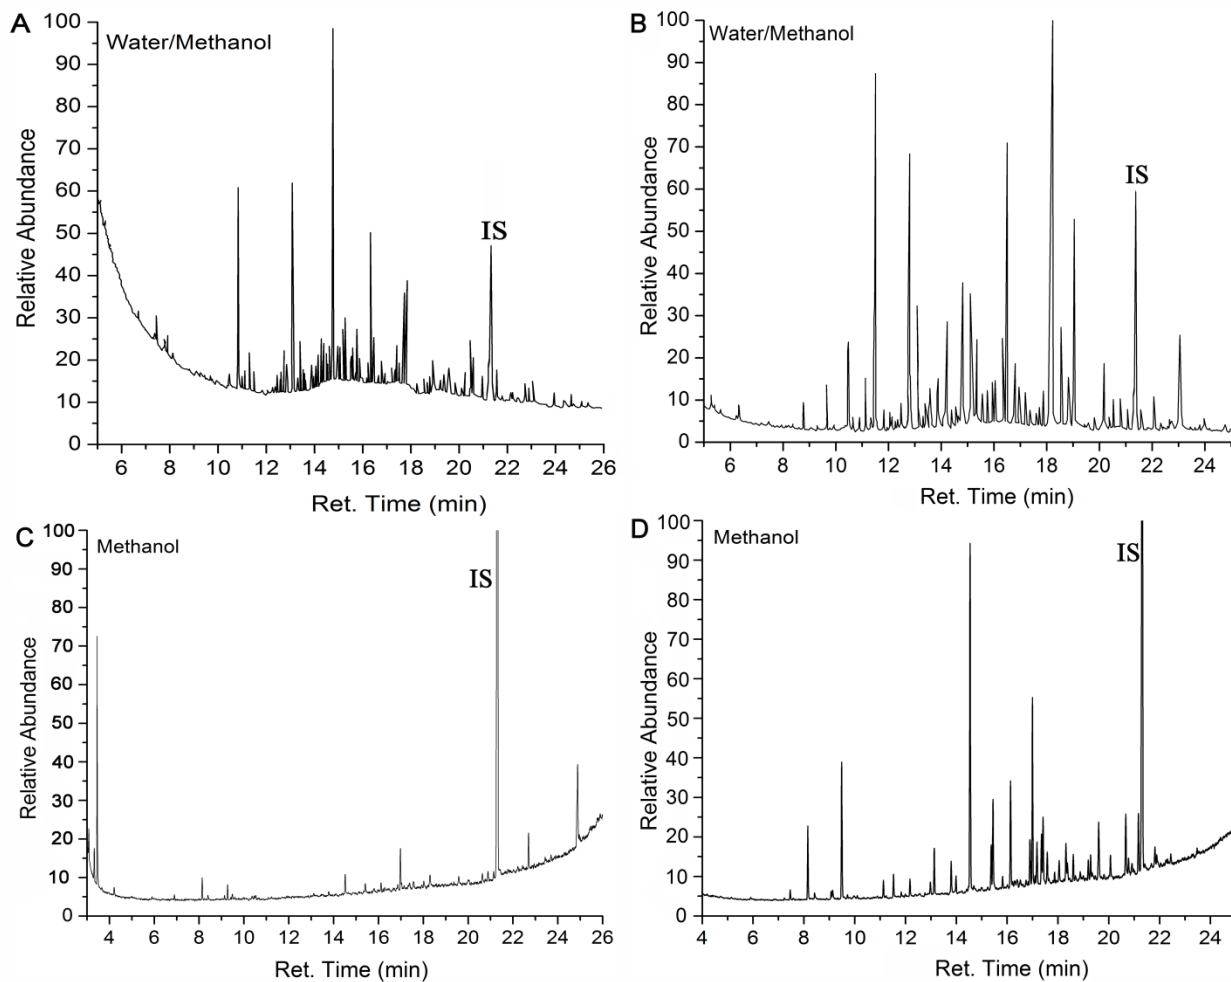

**Figure S2** A) EtOAc soluble products B) Water soluble products from the reaction in methanol (Table 3, entry 5), C) EtOAc soluble products D) Water soluble products from the reaction in water-methanol (Table 3, entry 10). \*IS-Internal Standard (Phenanthrene)

**Table S2** Compound identified in EtOAc soluble products of reaction in methanol (Table 3, entry 5).

| RT      | Compound Name                                                | Molecular Weight | Area % |
|---------|--------------------------------------------------------------|------------------|--------|
| 3.081   | Cyclopropanepentanoic acid, 2-undecyl-, methyl ester, trans- | 124              | 0.77   |
| 3.32    | Toluene                                                      | 92               | 0.99   |
| 3.447   | Acetic acid, 2-methylpropyl ester                            | 116              | 7.55   |
| 4.207   | Methyl 4-hydroxybutanoate                                    | 118              | 0.3    |
| 6.897   | 1,3,5-Cyclohexanetriol                                       | 132              | 0.23   |
| 8.133   | 1-Pentanol, 2-ethyl-4-methyl-                                | 130              | 0.8    |
| 8.392   | 3-Octanol, 3-methyl                                          | 144              | 0.17   |
| 9.131   | 3-Pentanol, 2,4-dimethyl-                                    | 116              | 0.15   |
| 9.271   | Isooctane, (ethenyloxy)-                                     | 156              | 0.5    |
| 9.483   | 1-Hexyne, 6-(1-ethoxyethoxy)-                                | 170              | 0.23   |
| 14.514  | Phenol, 2,6-dimethoxy-                                       | 154              | 0.86   |
| 15.41   | Benzaldehyde, 3-(chloroacetoxy)-4-methoxy-                   | 228              | 0.41   |
| 16.112  | o-hydroxy, phenyl acetic acid                                | 152              | 0.36   |
| 16.978  | Phenol,2,6-bis(dimethylethyl)-4-methyl                       | 220              | 1.79   |
| 18.298  | Benzene acetic acid, 3-methoxy                               | 166              | 0.58   |
| 20.632  | 1,4-heptadiene,5,6-hydroxy, 6-methyl                         | 142              | 0.62   |
| 20.885  | 1,4-Cyclohexadiene                                           | 80               | 0.86   |
| 21.309* | Phenanthrene                                                 | 178              | 76.57  |
| 22.694  | Hexadecanoic acid, methyl ester                              | 270              | 1.34   |
| 24.852  | 16-hydroxy, 9-octadecanoic acid, methyl ester                | 312              | 1.59   |
| 24.884  | Cyclopropanepentanoic acid, 2-undecyl-, methyl ester, trans- | 310              | 2.9    |

\*Internal standard

**Table S3** Compound identified in water soluble products of reaction in methanol (Table 3, entry 5).

| RT      | Compound Name                                     | Molecular Weight | Area % |
|---------|---------------------------------------------------|------------------|--------|
| 3.445   | Acetic acid, 2-methylpropyl ester                 | 116              | 1.23   |
| 8.195   | 1-Hexanol, 2-ethyl-                               | 130              | 2.14   |
| 9.535   | Phenol, 2-methoxy-                                | 124              | 4.28   |
| 11.17   | Phenol, 3-ethyl-                                  | 122              | 0.55   |
| 11.575  | Phenol, 2-methoxy-4-methyl-                       | 138              | 0.75   |
| 12.225  | Benzofuran, 2,3-dihydro-                          | 120              | 0.54   |
| 13.02   | 1,2-Benzenediol, 3-methoxy-                       | 140              | 0.32   |
| 13.17   | Phenol, 4-ethyl-2-methoxy-                        | 152              | 1.49   |
| 13.83   | 2-Methoxy-4-vinylphenol                           | 150              | 0.93   |
| 14.015  | Phenol, 4-ethyl-2-methoxy-                        | 152              | 0.49   |
| 14.59   | Phenol, 2,6-dimethoxy-                            | 154              | 11.56  |
| 15.4    | Benzaldehyde, 3,4-dimethoxy-, methylmonoacetal    | 198              | 1.37   |
| 15.485  | 4-Hydroxy-2-methoxybenzaldehyde                   | 152              | 2.8    |
| 16.18   | Phenol, 2-methoxy-4-(1-propenyl)-                 | 164              | 3.94   |
| 16.945  | Ethanone, 1-(4-hydroxy-3-methoxyphenyl)-          | 166              | 1.59   |
| 17.04   | Butylated Hydroxytoluene                          | 220              | 5.99   |
| 17.215  | 1,2-Dimethoxy-4-n-propylbenzene                   | 180              | 1.43   |
| 17.38   | Benzoic acid, 4-hydroxy-3-methoxy-, methyl ester  | 182              | 1.82   |
| 17.45   | Benzene, 1,2,3-trimethoxy-5-methyl-               | 182              | 2.02   |
| 17.61   | 2-Propanone, 1-(4-hydroxy-3-methoxyphenyl)-       | 180              | 1.08   |
| 18.075  | 2-methylphenol                                    | 108              | 0.72   |
| 18.345  | 4-Ethoxy-3-methoxyphenethyl alcohol               | 196              | 1.35   |
| 18.405  | 3,4-Dimethoxyphenyllactic acid                    | 226              | 0.47   |
| 18.64   | Phenol, 2,6-dimethoxy-4-(2-propenyl)-             | 194              | 0.91   |
| 19.24   | 3-methoxy, thiophenol                             | 124              | 0.73   |
| 19.315  | 1-phenyl, propanol                                | 136              | 0.79   |
| 19.65   | Benzaldehyde, 4-hydroxy-3,5-dimethoxy-            | 182              | 2.2    |
| 20.095  | Phenol, 2,6-dimethoxy-4-(2-propenyl)-             | 194              | 0.64   |
| 20.72   | Ethanone, 1-(4-hydroxy-3,5-dimethoxyphenyl)-      | 196              | 2.41   |
| 21.225  | Benzoic acid, 4-hydroxy-3,5-dimethoxy-, hydrazide | 212              | 2.25   |
| 21.375* | Phenanthrene                                      | 178              | 40.65  |
| 21.86   | 2-Isopropylbenzenethiol                           | 152              | 0.56   |

\*Internal standard

**Table S4** Compound identified in EtOAc soluble products of reaction in water-methanol (Table 3, entry 10).

| RT     | Compound Name                                                                                           | Molecular Weight | Area % |
|--------|---------------------------------------------------------------------------------------------------------|------------------|--------|
| 11.12  | 2-Naphthalenol, 1,2-dihydro-,acetate                                                                    | 188              | 0.78   |
| 11.31  | Dodecane                                                                                                | 170              | 1.34   |
| 11.47  | à-Irone                                                                                                 | 206              | 1.48   |
| 12.61  | Cyclopropanetetradecanoic acid,2-octyl-, methyl ester                                                   | 394              | 4.75   |
| 12.72  | 2-Cyclopenten-1-one, 2-(2-butenyl)-4-hydroxy-3-methyl,(Z)                                               | 166              | 1.46   |
| 13.53  | 2-hydroxy-6-hexadecenoic acid, methyl ester                                                             | 356              | 1.91   |
| 13.86  | Trans-Z-à-Bisabolene epoxide                                                                            | 220              | 1.11   |
| 14.27  | 1-Hexadecanol,2-methyl-                                                                                 | 256              | 1.67   |
| 14.38  | Dodecane, 2,6,10-trimethyl-                                                                             | 212              | 1.47   |
| 14.48  | à-acorenol                                                                                              | 222              | 0.90   |
| 14.75  | Tetradecane                                                                                             | 198              | 19.04  |
| 15.06  | 5-Isopropylidene-6-methyl deca-3,6,9-trien-2-one                                                        | 204              | 1.33   |
| 15.26  | Naphthalene, 1,7-dimethyl-                                                                              | 156              | 5.10   |
| 15.33  | 2H-Cyclohepta[b]furan-2-one, 6-[1-(acetyloxy)-3-oxobutyl]-3,3a, 4,7,8,8a-hexahydro-7-methyl-3-methylene | 306              | 1.26   |
| 15.75  | Tetradecane, 2,6,10-trimethyl-                                                                          | 240              | 3.94   |
| 15.96  | Cyclohexane,1,1,3-trimethyl-2,3-epoxy-2(3-methylcyclobuten-2-yl)-4-acetyloxy-                           | 264              | 0.76   |
| 16.33  | Hexadecane                                                                                              | 226              | 5.58   |
| 16.47  | 3-tert-Butyl-4-hydroxyanisole                                                                           | 180              | 1.65   |
| 17.40  | 1-Dodecanol,3,7,11-trimethyl-                                                                           | 228              | 3.48   |
| 17.52  | 2-Butenal, 2-methyl-4-(2,6,6-trimethyl-1-cyclohexen-1-yl)-                                              | 206              | 1.19   |
| 17.72  | 1-Hexadecanol, acetate                                                                                  | 284              | 8.89   |
| 17.83  | Nonadecane                                                                                              | 268              | 3.17   |
| 18.52  | Xanthatin,1'-acetoxy-3-methyl-3-demethylene-1',2'-dihydro-                                              | 308              | 1.18   |
| 18.89  | 8-Octadecanone                                                                                          | 268              | 2.04   |
| 20.21  | Heptadecane, 3methyl-                                                                                   | 254              | 0.90   |
| 20.50  | 1-Docosene                                                                                              | 308              | 1.74   |
| 20.59  | Heptacosane                                                                                             | 380              | 2.04   |
| 21.32* | Phenanthrene                                                                                            | 178              | 13.56  |
| 21.57  | 2-Myristynoyl pantetheine                                                                               | 484              | 1.55   |
| 23.03  | 2-Hexadecanol                                                                                           | 242              | 4.73   |

\*Internal Standard

**Table S5** Compound identified in water soluble products of reaction in water-methanol (Table 3, entry 10).

| RT    | Compound Name                                                              | Molecular Weight | Area % |
|-------|----------------------------------------------------------------------------|------------------|--------|
| 9.64  | 2-Cyclopenten-1-one, 2,3,4,5-tetramethyl-                                  | 138              | 0.90   |
| 10.46 | 1,4-Benzenediol, 2,5-dimethyl-                                             | 138              | 1.93   |
| 11.12 | 1-Cyclohexene-1-carboxaldehyde, 2,6,6-trimethyl-                           | 152              | 0.93   |
| 11.50 | Phenol, 2,4,6-trimethyl-                                                   | 136              | 10.37  |
| 12.62 | 2-Cyclopenten-1-one, 2-(2-butenyl)-4-hydroxy-3-methyl-, (Z)                | 166              | 0.77   |
| 12.74 | Benzene, 1-ethoxy-2-methoxy-4-methyl-                                      | 166              | 2.08   |
| 12.80 | 1,4-Benzenediol, 2,3,5-trimethyl-                                          | 152              | 5.17   |
| 13.07 | Phenol, 2-ethyl-4,5-dimethyl-                                              | 150              | 3.08   |
| 13.58 | 2(3H)-Naphthalenone, 4,4a,5,6,7,8-hexahydro-1-methoxy-                     | 180              | 1.41   |
| 13.87 | Phenol, 3-methoxy-2,5,6-trimethyl-                                         | 166              | 1.57   |
| 14.21 | Phenol, 2,3,5,6-tetramethyl-                                               | 150              | 2.59   |
| 15.11 | 2,5-Heptadienoic anhydride, 2,3,4,5,6-pentamethyl, Z,Z-                    | 208              | 2.47   |
| 15.21 | 3-Buten-2-one,3-methyl-4-(1,3,3-trimethyl-7-oxabicyclo[4.1.0]heptan-1-yl)- | 222              | 0.98   |
| 15.33 | Phenol, 5-methoxy-2,3,4-trimethyl-                                         | 166              | 1.58   |
| 15.55 | 1,4-Benzenediol, 2,3,5-trimethyl-                                          | 152              | 1.36   |
| 15.76 | 2-Oxabicyclo[3.3.0] oct-7-en-3-one, 7-(-1-hydroxypentyl)-                  | 210              | 0.70   |
| 15.93 | 5,6,7,8-Tetramethylbicyclo[4.1.0]Hept-4-en-3-one                           | 164              | 1.53   |
| 16.03 | Carbofurane                                                                | 221              | 0.99   |
| 16.49 | Phenol, 3-(1,1-dimethylethyl)-4-methoxy-                                   | 180              | 5.53   |
| 16.69 | Phenol, 5-methoxy-2,3-dimethyl-                                            | 152              | 0.69   |
| 16.79 | Phenol, 4-methoxy-2,3,6-trimethyl-                                         | 166              | 1.22   |
| 16.94 | Phenol, 2-(1,1-dimethylethyl)-3-methyl-                                    | 164              | 0.68   |
| 17.26 | àTetralol, 2-amino-5,6-dimethoxy-                                          | 223              | 0.74   |
| 17.34 | Benzene, 1,4-dimethoxy-2,3,5,6-tetramethyl-                                | 194              | 0.65   |
| 18.24 | Durohydroquinone                                                           | 166              | 19.05  |
| 18.53 | Phenol, 2-methoxy-4-methyl-6-[propenyl]-                                   | 178              | 1.86   |
| 18.81 | Phenol, 3-(1,1-dimethylethyl)-4-methoxy-                                   | 180              | 1.08   |
| 19.03 | 4',6'-Dihydroxy-2',3'-dimethylacetophenone                                 | 180              | 4.11   |
| 20.17 | 2-Hydroxy-4,5-methylene dioxypropiofenone                                  | 194              | 1.28   |
| 20.51 | 3-Ethyl-4,4-dimethyl-2-(2-methylpropenyl)cyclohex-2-enone                  | 206              | 0.75   |
| 20.59 | 4(3,3-Dimethylbut-1-ynyl)4-hydroxy-2,6,6-trimethylcyclohex-2-enone         | 234              | 0.68   |

|        |                                                           |     |       |
|--------|-----------------------------------------------------------|-----|-------|
| 20.78  | 4,7-Dimethoxy-2-methyl indan-1-one                        | 206 | 0.73  |
| 21.29* | Phenanthrene                                              | 178 | 16.65 |
| 21.35  | Phenol, 2,5-bis(1,1-dimethylethyl)-                       | 206 | 0.79  |
| 22.06  | Trimethyl-3,4-methylene dioxychromane                     | 220 | 0.69  |
| 23.05  | 7,9-Ditert-butyl-1-oxaspiro-[<br>4,5]-deca-6,9-dien-8-one | 262 | 2.41  |

\*Internal Standard
